# Supplementary figures and images for: Novel Negev-like RNA Viruses Encoding Membrane Proteins of SP24 Family in Hosts Ranging from Algae to Vertebrates
Source: Preprints.org preprint supplement (doi:10.20944/preprints202310.1859.v1), 2023-10-30

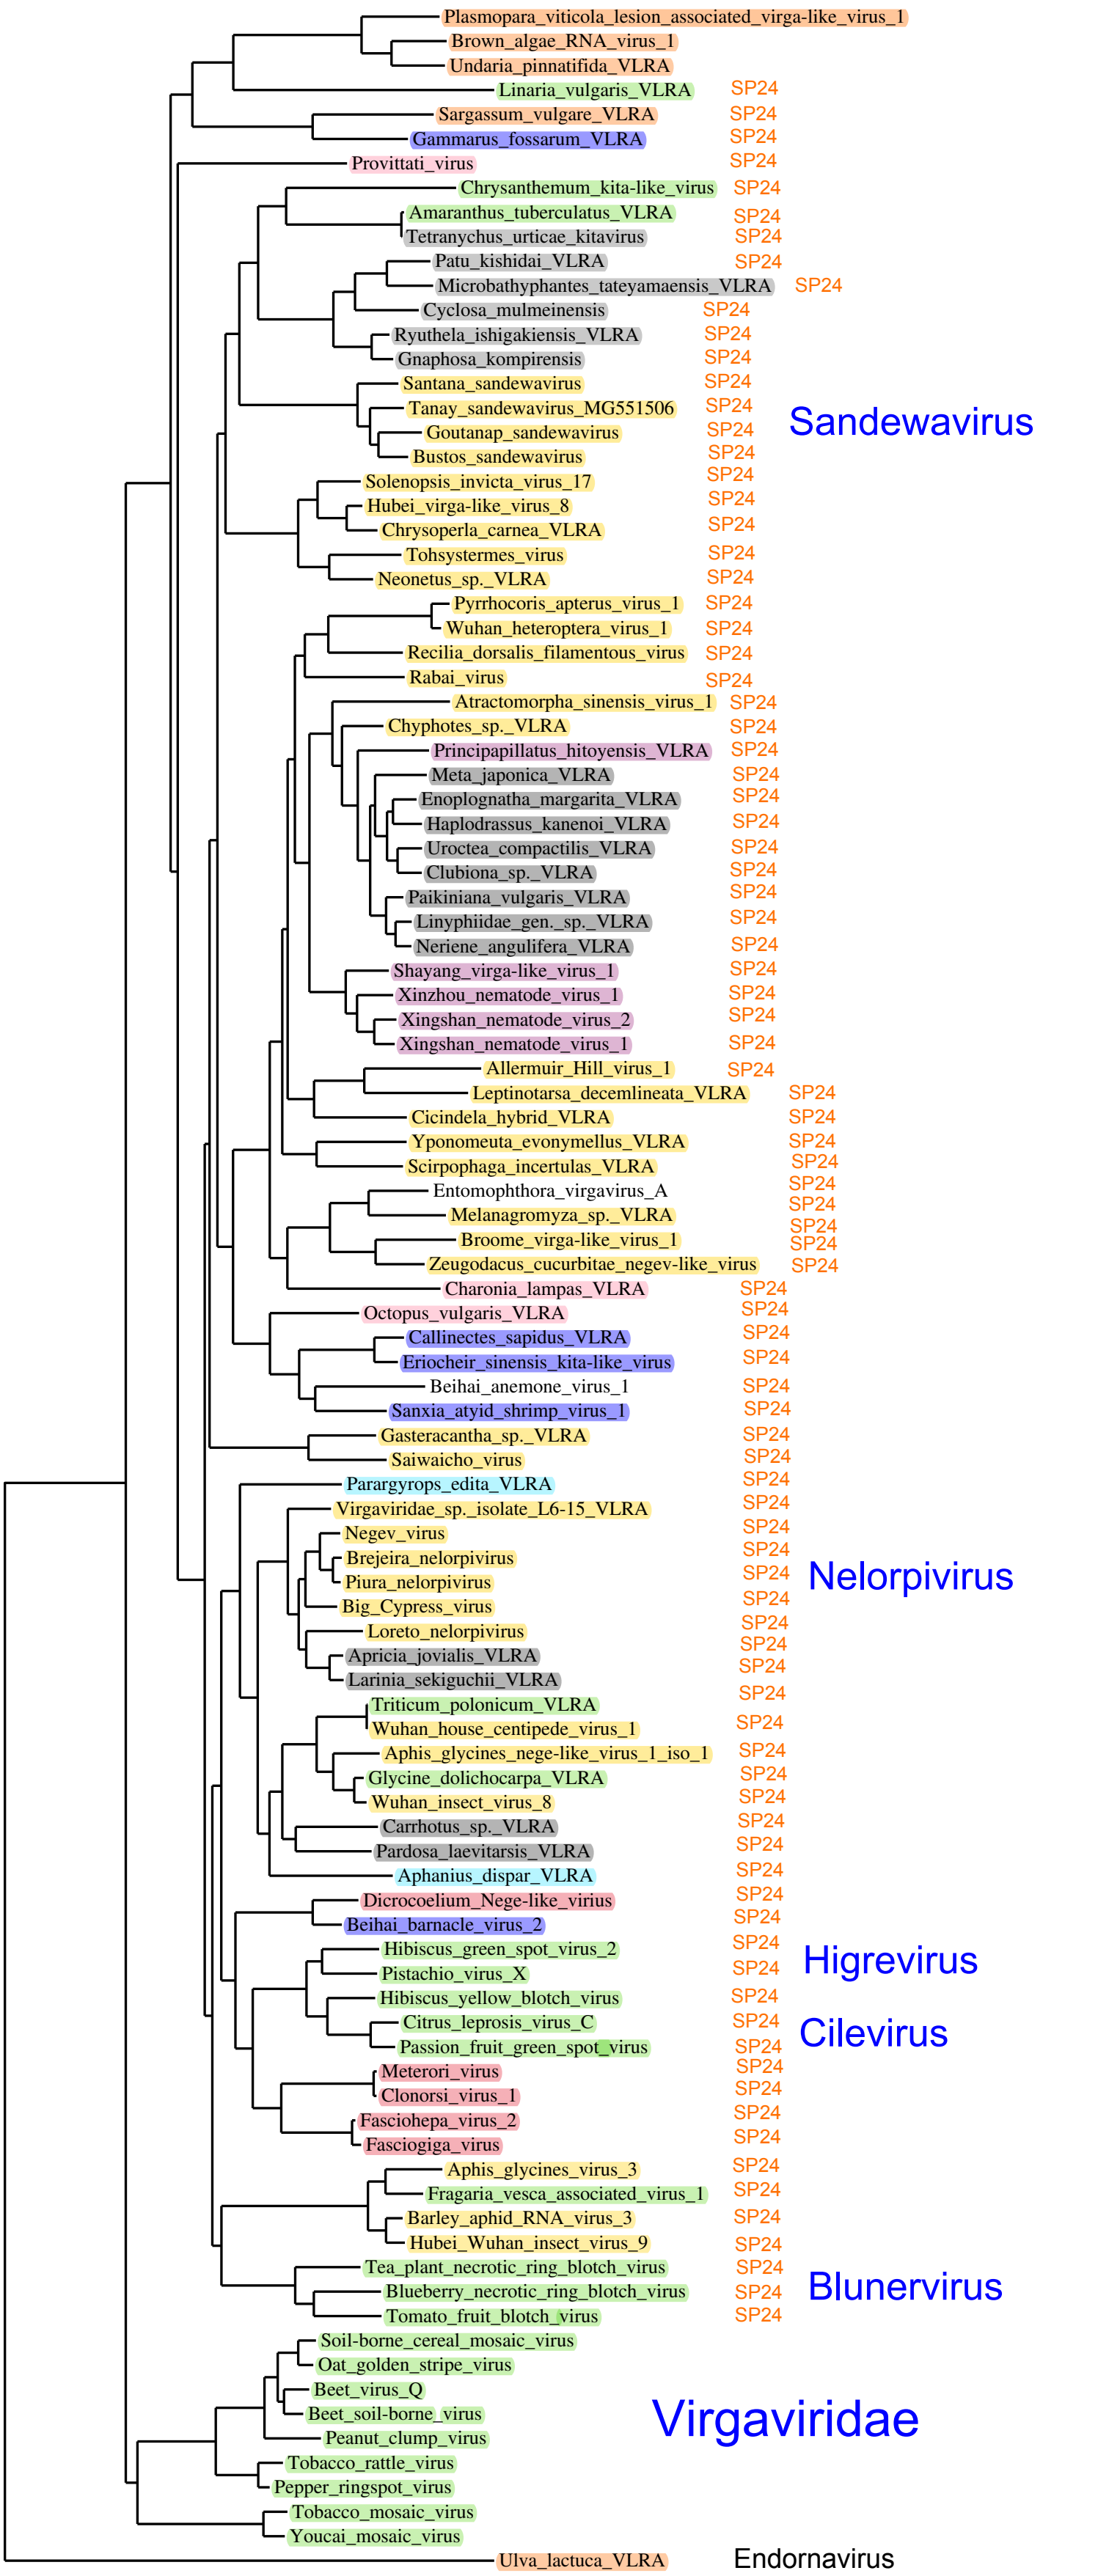

Supplement: Supplementary file 1 [file supplementary]
